# Supplementary material
Source: HighWire-hosted journal article supplement (https://gh.bmj.com/content/7/10/e008797)
Supplement: inline-supplementary-material-6 [file inline-supplementary-material-6.pdf]

## Appendix S5

Low-and-Middle  
Income Countries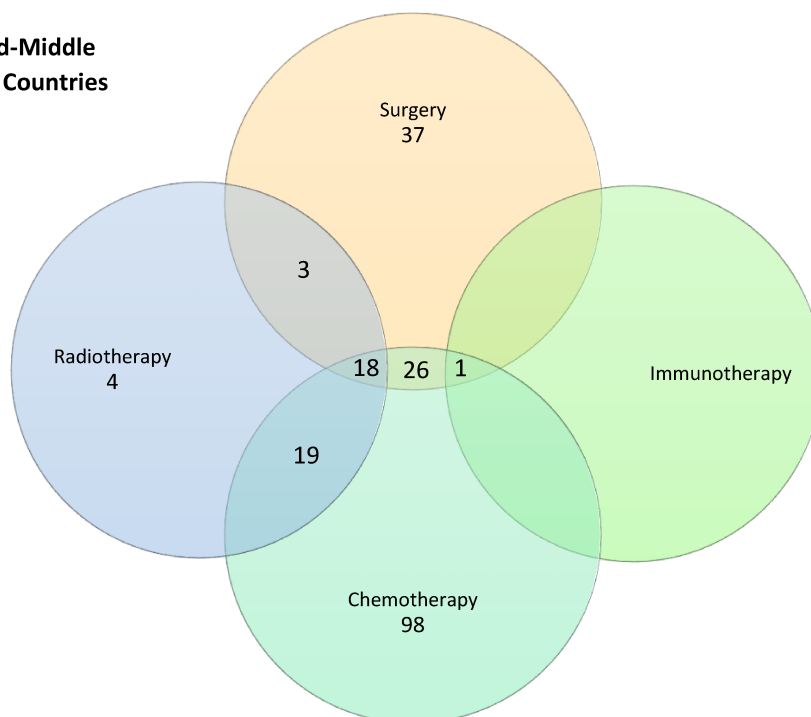High Income  
Countries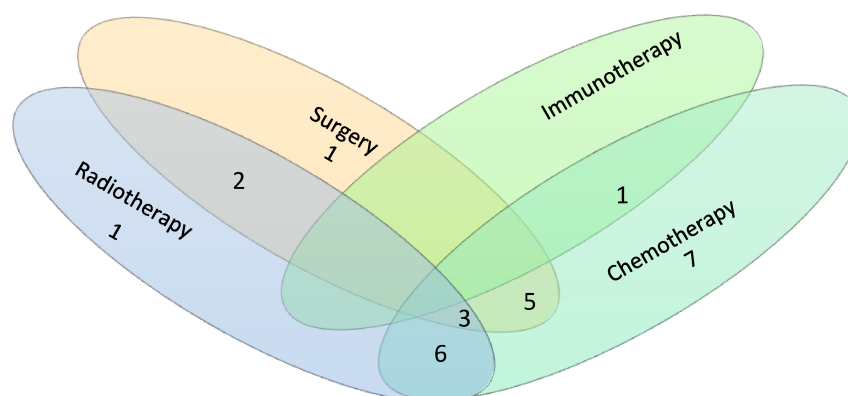

*Venn diagrams of treatments planned in initial multi-disciplinary team meeting for patients who were switched to palliative care*
